# Supplementary material for: Efficient and Stable Ni/SBA-15 Catalyst for Dry Reforming of Methane: Effect of Citric Acid Concentration
Source: MDPI journal article supplement (doi:10.3390/catal13060916), 2023-05-23
Supplement: s1 [file s1]

## **Supplementary Information**

# **Efficient and Stable Ni/SBA-15 Catalyst for Dry Reforming of Methane: Effect of Citric Acid Concentration**

**Mamoona Waris <sup>1,†</sup>, Howon Ra <sup>2,†</sup>, Sungmin Yoon <sup>1,2</sup>, Min-Jae Kim <sup>1,\*</sup> and Kyubock Lee <sup>1,\*</sup>**

<sup>1</sup> Graduate School of Energy Science and Technology, Chungnam National University, 99 Daehak-ro, Yuseong-gu, Daejeon 34134, Republic of Korea

<sup>2</sup> Korea Institute of Energy Research (KIER), 152 Gajeong-ro, Yuseong-gu, Daejeon 34129, Republic of Korea

\* Correspondence: minjaek@cnu.ac.kr (M.-J.K.); kyubock.lee@cnu.ac.kr (K.L.); Tel.: +82-42-821-8617 (M.-J.K.); +82-42-821-8610 (K.L.); Fax: +82-42-821-8839 (M.-J.K. & K.L.).

† These authors contributed equally to this study.

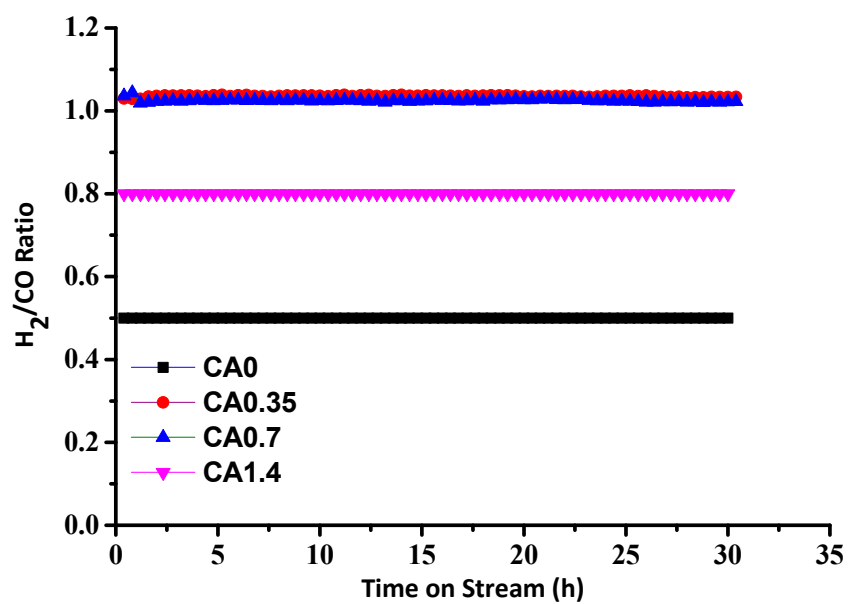

**Figure S1.** Catalytic yield for DRM. Reaction conditions:  $CH_4/CO_2 = 1$ ,  $T = 700\text{ }^\circ\text{C}$ ,  $P = 1.0\text{ atm}$ , and  $GHSV = 96,000\text{ mL}\cdot\text{g}^{-1}\text{h}^{-1}$ ).

Table S1: Comparison of catalysts used in this work with previous literature.

| Catalyst               | T (°C) | GHSV<br>(L gcat <sup>-1</sup> h <sup>-1</sup> ) | CH <sub>4</sub> conversion<br>(%) | CO <sub>2</sub> conversion<br>(%) | Reference    |
|------------------------|--------|-------------------------------------------------|-----------------------------------|-----------------------------------|--------------|
| 7%Ni/SBA-15 CA<br>0.35 | 700    | 96                                              | 87                                | 92                                | This<br>work |
| 5%Ni/SBA-15            | 700    | 12.9                                            | 82                                | 85                                | [1]          |
| 5%Ni/SBA-15            | 650    | 27                                              | 75                                | 87                                | [2]          |
| 5%Ni/SBA-16            | 650    | 18                                              | 50.1                              | 60                                | [3]          |
| 5%Ni/SBA-15            | 650    | 180                                             | 60                                | 71                                | [4]          |
| 5%Ni/F-SBA-15          | 800    | 15                                              | 85                                | 85                                | [5]          |
| 5%Ni/SBA-15            | 700    | 22.5                                            | 75                                | 85                                | [6]          |
| 5%Ni/SBA-15            | 700    | 36                                              | 62                                | 69                                | [7]          |
| 5%Ni/SBA-15            | 650    | 36                                              | 75                                | 78                                | [8]          |
| 10%Ni/SBA-15           | 700    | 36                                              | 78                                | 85                                | [9]          |

## Reference

1. Liu, H.; Li, Y.; Wu, H.; Takayama, H.; Miyake, T.; He, D., Effects of  $\beta$ -cyclodextrin modification on properties of Ni/SBA-15 and its catalytic performance in carbon dioxide reforming of methane. *Catal. Commun.* **2012**, *28*, 168–173. <https://doi.org/10.1016/j.catcom.2012.08.035>.
2. Daoura, O., Boutros, M., Kaydouh, M.-N., Massiani, P., Launay, F., Hassan, N. E. Supported nickel nanocatalysts for the dry reforming of methane: Effect of SBA-15's pore sizes on the catalytic performances of nickel nanoparticles. In *Nanostructured Catalysts for Environmental Applications*; Dosa, M.; Piumetti, M., Eds.; Springer: Berlin, Germany, 2021; pp. 113–126. ISBN 978-3-030-58933-2.
3. Tannous, J., Karam, L., Kaydouh, M.N., El Zakhem, H., El Hassan, N. and Casale, S. Effect of pore geometry of mesoporous supports on catalytic performances in methane reforming. *MATEC Web Conf.* **2018**, *171*, 8–12. <https://doi.org/10.1051/mateconf/201817101003>.
4. L. Karam, L.; El Hassan, N. Advantages of mesoporous silica-based catalysts in methane reforming by CO<sub>2</sub> from kinetic perspective. *J. Environ. Chem. Eng.* **2018**, *6*, 4289–4297. <https://doi.org/10.1016/j.jece.2018.06.031>.
5. Chong, C.C.; Cheng, Y.W.; Bukhari, S.N.; Setiabudi, H.D.; Jalil, A.A. Methane dry reforming over Ni/fibrous SBA-15 catalysts: Effects of support morphology (rod-like F-SBA-15 and dendritic DFSBA-15). *Catal Today* **2021**, *375*, 245–257. <https://doi.org/10.1016/j.cattod.2020.06.073>.
6. Zhang, Q.; Zhang, T.; Shi, Y.; Zhao, B.; Wang, M.; Liu, Q.; Wang, J.; Long, K.; Duan, Y.; Ning, P. A sintering and carbon-resistant Ni-SBA-15 catalyst prepared by solid-state grinding method for dry reforming of methane. *J. CO<sub>2</sub> Util.* **2017**, *17*, 10–19.
7. Zhang, Q., Wang, J., Ning, P., Zhang, T., Wang, M., Long, K. and Huang, J. Dry reforming of methane over Ni/SBA-15 catalysts prepared by homogeneous precipitation method. *Korean J. Chem. Eng.* **2017**, *34*, 2823–2831. <https://doi.org/10.1007/s11814-017-0182-2>.
8. Kaydouh, M.N.; El Hassan, N.; Davidson, A.; Massiani, P. Optimization of Synthesis Conditions of Ni/SbA-15 Catalysts: Confined Nanoparticles and Improved Stability in Dry Reforming of Methane. *Catalysts* **2021**, *11*, 1–17. <https://doi.org/10.3390/catal11010044>.
9. S. Qiu, Q. Zhang, W. Qiu, S.; Zhang, Q.; Lv, W.; Wang, T.; Zhang, Q.; Ma, L. Simply packaging Ni nanoparticles inside SBA-15 channels by co-impregnation for dry reforming of methane. *RSC Adv.* **2017**, *7*, 24551–24560. <https://doi.org/10.1039/c7ra00149e>.
